# Supplementary material
Source: PubMed Central journal article supplement (PMC9871947)
Supplement: jamapediatr-e226243-s001.pdf [file jamapediatr-e226243-s001.pdf]

## Supplemental Online Content

Watanabe A, Kani R, Iwagami M, Takagi H, Yasuhara J, Kuno T. Assessment of efficacy and safety of mRNA COVID-19 vaccines in children aged 5 to 11 years: a systematic review and meta-analysis. *JAMA Pediatr*. Published online January 23, 2023.

doi:10.1001/jamapediatrics.2022.6243

**eTable 1.** Baseline characteristics

**eTable 2.** Risk of bias assessment for randomized trials

**eTable 3.** Risk of bias assessment for observational studies

**eTable 4.** The overall certainty of each outcome

**eFigure 1.** Funnel plots for outcomes comparing vaccinated and unvaccinated children

**eFigure 2.** Forest plots for SARS-CoV-2 infections with or without symptoms in the omicron-predominant period

**eFigure 3.** Forest plots for symptomatic SARS-CoV-2 infections according to the predominant subvariants

**eFigure 4.** Forest plots comparing 1-dose vaccination versus no vaccination

**eFigure 5.** Forest plots showing the proportion of adverse events following the 1st dose of mRNA vaccination

**eFigure 6.** Forest plots showing the proportion of adverse events following the 2nd dose of mRNA vaccine

**eFigure 7.** Funnel plots for the proportion of each adverse events following the 2nd dose of mRNA vaccination

**eFigure 8.** Sensitivity analysis using the trim-and-fill technique for myocarditis

This supplemental material has been provided by the authors to give readers additional information about their work.

eTable 1. Baseline characteristics

| Author                         | Vaccination status | Ethnicity and race, N(%)                                                                                                                                                                                 | Obesity, N(%) | Respiratory disease, N(%) | Cardiovascular disease, N(%) | Immuno-suppression, N(%) | Neurologic disease, N(%) | Diabetes, N(%) | Chronic kidney disease, N(%) | Cancer, N(%) |
|--------------------------------|--------------------|----------------------------------------------------------------------------------------------------------------------------------------------------------------------------------------------------------|---------------|---------------------------|------------------------------|--------------------------|--------------------------|----------------|------------------------------|--------------|
| Cohen-Stavi CJ <sup>31</sup>   | Vaccinated         | General Jewish, 79560(84); Arab, 11180(12); Ultra-Orthodox Jewish, 3988(4.2)                                                                                                                             | 15802 (17)    | Asthma, 3444(3.6)         | 76 (<0.1) NA                 | 986 (1.0)                | 797 (0.8)                | 96 (<0.1)      | 1671 (1.8)                   | 48 (<0.1)    |
|                                | Unvaccinated       | General Jewish, 79560(84); Arab, 11180(12); Ultra-Orthodox Jewish, 3988(4.2)                                                                                                                             | 15802 (17)    | Asthma, 3646 (3.8)        | 101 (0.1) NA                 | 1042 (1.1)               | 954 (1.0)                | 105 (0.1)      | 1714 (1.8)                   | 62 (<0.1)    |
| Fleming-Dutra KE <sup>30</sup> | Vaccinated         | American Indian or Alaska natives, 155(1.1); Asian 2222(15.5); Black or African American, 1402(9.8); Native Hawaiian or Other Pacific Islander, 57(0.4); White, 10518(73.3); Hispanic/Latino, 3014(20.3) | NA            | NA                        | NA                           | 0(0)                     | NA                       | NA             | NA                           | NA           |
|                                | Unvaccinated       | American Indian or Alaska Native, 650(1.3); Asian, 3017(5.8); Black or African                                                                                                                           | NA            | NA                        | NA                           | 0(0)                     | NA                       | NA             | NA                           | NA           |

|                          |              |                                                                                                                              |    |    |    |    |    |    |    |    |
|--------------------------|--------------|------------------------------------------------------------------------------------------------------------------------------|----|----|----|----|----|----|----|----|
|                          |              | American, 12037(23.3); Native Hawaiian or Other Pacific Islander, 57(0.4); White, 35381(68.6); Hispanic/Latino, 14324(26.6,) |    |    |    |    |    |    |    |    |
| Price AM <sup>14</sup>   | Vaccinated   | NA                                                                                                                           | NA | NA | NA | NA | NA | NA | NA | NA |
|                          | Unvaccinated | NA                                                                                                                           | NA | NA | NA | NA | NA | NA | NA | NA |
| Fowlkes AL <sup>13</sup> | 2 doses      | NA                                                                                                                           | NA | NA | NA | NA | NA | NA | NA | NA |
|                          | 1 dose       | NA                                                                                                                           | NA | NA | NA | NA | NA | NA | NA | NA |
|                          | Unvaccinated | NA                                                                                                                           | NA | NA | NA | NA | NA | NA | NA | NA |
| Tan SHX <sup>33</sup>    | 2 doses      | Chinese 5134163(69.3); Malay, 1240769(16.8); Indian, 785266(10.6); Other, 244868(3.3)                                        | NA |
|                          | 1 dose       | Chinese, 3720381(69.7); Malay, 889602(16.7); Indian, 557723(10.4); Other, 172499(3.2)                                        | NA |
|                          | Unvaccinated | Chinese, 3619247(70.7); Malay, 743466(14.5); Indian, 494626(9.7); Other, 261129(5.1)                                         | NA |

|                         |              |                                                                                                                                                                                                                                                              |    |    |    |    |    |    |    |    |
|-------------------------|--------------|--------------------------------------------------------------------------------------------------------------------------------------------------------------------------------------------------------------------------------------------------------------|----|----|----|----|----|----|----|----|
| Sacco C <sup>34</sup>   | 2 doses      | NA                                                                                                                                                                                                                                                           | NA | NA | NA | NA | NA | NA | NA | NA |
|                         | 1 dose       | NA                                                                                                                                                                                                                                                           | NA | NA | NA | NA | NA | NA | NA | NA |
|                         | Unvaccinated | NA                                                                                                                                                                                                                                                           | NA | NA | NA | NA | NA | NA | NA | NA |
| Klein NP <sup>20</sup>  | Vaccinated   | NA                                                                                                                                                                                                                                                           | NA | NA | NA | NA | NA | NA | NA | NA |
|                         | Unvaccinated | NA                                                                                                                                                                                                                                                           | NA | NA | NA | NA | NA | NA | NA | NA |
| Creech CB <sup>19</sup> | Vaccinated   | White, 1957(65.1); Black, 309(10.3); Asian, 298(9.9); American Indian or Alaska Native, 14(0.5); Native Hawaiian or Other Pacific Islander, 4(0.1); Multiracial, 327(10.9); Other race, 62(2.1); Hispanic/Latinx, 561(18.7); non-Hispanic/Latinx, 2417(80.4) | NA |
|                         | Unvaccinated | White, 668(67.1); Black, 93(9.3); Asian, 100(10.1); American Indian or Alaska Native, 3(0.3); Native Hawaiian or Other Pacific Islander, 0(0); Multiracial, 97(9.7); Other race, 22(2.2);                                                                    | NA |

|                           |              |                                                                                                                                       |               |                                        |         |                       |    |        |    |    |
|---------------------------|--------------|---------------------------------------------------------------------------------------------------------------------------------------|---------------|----------------------------------------|---------|-----------------------|----|--------|----|----|
|                           |              | Hispanic/Latinx, 181(18.2); non-Hispanic/Latinx, 805(80.9)                                                                            |               |                                        |         |                       |    |        |    |    |
| Walter EB <sup>15</sup>   | Vaccinated   | White, 1204(79.3); Black, 89(5.9); Asian, 90(5.9); Multiracial, 109(7.2); Other or not responded, 26(1.7); Hispanic/Latinx, 319(21.0) | 608<br>(20.2) | Asthma/Chronic lung disease, 529(17.6) | 19(0.6) | HIV infection, 4(0.1) | NA | 9(0.3) | NA | NA |
|                           | Unvaccinated | White, 586(78.1); Black, 58(7.7); Asian, 47(6.3); Multiracial, 49(6.5); Other or not reported, 10(1.3); Hispanic/Latinx, 159(21.2)    | 195<br>(19.6) | Asthma/Chronic lung disease, 173(17.4) | 7(0.7)  | HIV infection, 0(0)   | NA | 5(0.5) | NA | NA |
| Zambrano LD <sup>12</sup> | Vaccinated   | NA                                                                                                                                    | 174<br>(11.5) | NA                                     | NA      | NA                    | NA | NA     | NA | NA |
|                           | Unvaccinated | NA                                                                                                                                    | 92<br>(12.3)  | NA                                     | NA      | NA                    | NA | NA     | NA | NA |
| Amir O <sup>35</sup>      | Vaccinated   | General Jewish, 347726(94.9); Ultra-orthodox, 11871(3.2); Arab, 6767(1.8)                                                             | NA            | NA                                     | NA      | NA                    | NA | NA     | NA | NA |

|                        |              |                                                                                                                                                                                    |    |    |    |    |    |    |    |    |
|------------------------|--------------|------------------------------------------------------------------------------------------------------------------------------------------------------------------------------------|----|----|----|----|----|----|----|----|
|                        | Unvaccinated | General Jewish, 318513(86.7);<br>Ultra-orthodox, 24140(6.6);<br>Arab, 24515(6.7)                                                                                                   | NA |
| Shi DS <sup>36</sup>   | Vaccinated   | White, non-Hispanic, 27(66.5);<br>Hispanic, 6(21.2); Asian or<br>Pacific Islander, non-Hispanic,<br>6(6.1); Black, non-Hispanic,<br>6(5.4); Other races/unknown,<br>3(0.9)         | NA |
|                        | Unvaccinated | Black, non-Hispanic, 101(34.0);<br>White, non-Hispanic, 93(30.7);<br>Hispanic, 79(18.9); Asian or<br>Pacific Islander, non-Hispanic,<br>12(6.1); Other races/unknown,<br>16(10.3,) | NA |
| Block JP <sup>37</sup> | 2 doses      | Asian, 131205(5); Black or<br>African American, 395283(16);<br>Other, 90122(4); White,<br>1407974(57); Missing,<br>204224(8); Hispanic,<br>298270(12)                              | NA |
|                        | 1 dose       | Asian, 133445(5); Black or<br>African American, 408657(16);                                                                                                                        | NA |

|                        |              |                                                                                                                                          |    |    |    |    |    |    |    |    |
|------------------------|--------------|------------------------------------------------------------------------------------------------------------------------------------------|----|----|----|----|----|----|----|----|
|                        |              | Other, 93100(4); White, 1441573(57); Missing, 205834(8); Hispanic, 309468(12)                                                            |    |    |    |    |    |    |    |    |
|                        | Dose unknown | Asian, 83937(5); Black or African American, 283534(17); Other, 54305(3); White, 1001686(60); Missing, 98299(6); Hispanic, 169688(10)     | NA |
|                        | Unvaccinated | Asian, 348587(5); Black or African American, 1087474(16); Other, 237527(4); White, 3851233(57); Missing, 205834(8); Hispanic, 777426(12) | NA |
| Hause AM <sup>39</sup> | 3 doses      | NA                                                                                                                                       | NA | NA | NA | NA | NA | NA | NA | NA |
|                        | 2 doses      | NA                                                                                                                                       | NA | NA | NA | NA | NA | NA | NA | NA |
|                        | 1 dose       | NA                                                                                                                                       | NA | NA | NA | NA | NA | NA | NA | NA |
| Hause AM <sup>38</sup> | 2 doses      | NA                                                                                                                                       | NA | NA | NA | NA | NA | NA | NA |    |

|                         |         |                                                                     |    |                |       |    |      |    |      |    |
|-------------------------|---------|---------------------------------------------------------------------|----|----------------|-------|----|------|----|------|----|
|                         | 1 dose  | Hispanic, 7082(14.5); Not Hispanic, 40116(82.2); Unknown, 1597(3.3) | NA | NA             | NA    | NA | NA   | NA | NA   | NA |
| Capponi M <sup>41</sup> | 2 doses | NA                                                                  | NA | NA             | NA    | NA | NA   | NA | NA   | NA |
|                         | 1 dose  | NA                                                                  | NA | NA             | NA    | NA | NA   | NA | NA   | NA |
| Bloise S <sup>40</sup>  | 2 doses | NA                                                                  | NA | NA             | NA    | NA | NA   | NA | NA   | NA |
|                         | 1 dose  | NA                                                                  | NA | Asthma, 46(51) | 9(10) | NA | 8(9) | NA | 7(8) | NA |

NA, not available



eTable 2. Risk of bias assessment for randomized trials

| Author                  | Random sequence generation (selection bias) | Allocation concealment (selection bias) | Blinding of participants and personnel (performance bias) | Blinding of outcome assessment (detection bias) | Incomplete outcome assessment (attrition bias) | Selective reporting (reporting bias) | Other bias |
|-------------------------|---------------------------------------------|-----------------------------------------|-----------------------------------------------------------|-------------------------------------------------|------------------------------------------------|--------------------------------------|------------|
| Walter EB <sup>15</sup> | -                                           | -                                       | -                                                         | -                                               | -                                              | -                                    | -          |
| Creech CB <sup>19</sup> | -                                           | -                                       | -                                                         | -                                               | -                                              | -                                    | +          |

Each domain was judged as 'low risk of bias' (-), 'high risk of bias' (+), or 'unclear risk of bias' (?) in each study according to the Revised Cochrane risk-of-bias tool for randomized trials

eTable 3. Risk of bias assessment for observational studies

| Author                         | Risk of bias due to confounding | Risk of bias in selection of participants into the study | Risk of bias in departures from exposure | Risk of bias due to deviations from intended interventions | Risk of bias due to missing data | Risk of bias in measurement of the outcome | Risk of bias in selection of the reported result |
|--------------------------------|---------------------------------|----------------------------------------------------------|------------------------------------------|------------------------------------------------------------|----------------------------------|--------------------------------------------|--------------------------------------------------|
| Cohen-Stavi CJ <sup>31</sup>   | Low                             | Low                                                      | Low                                      | Low                                                        | Low                              | Low                                        | Low                                              |
| Fleming-Dutra KE <sup>30</sup> | Moderate                        | Low                                                      | Moderate                                 | Low                                                        | Moderate                         | Low                                        | Low                                              |
| Price AM <sup>14</sup>         | Moderate                        | Low                                                      | Moderate                                 | Low                                                        | Low                              | Moderate                                   | Low                                              |
| Fowlkes AL <sup>13</sup>       | Moderate                        | Low                                                      | Low                                      | Low                                                        | Low                              | Low                                        | Low                                              |
| Tan SHX <sup>33</sup>          | Moderate                        | Low                                                      | Low                                      | Low                                                        | Low                              | Low                                        | Low                                              |
| Sacco C <sup>34</sup>          | Moderate                        | Low                                                      | Low                                      | Low                                                        | Low                              | Low                                        | Low                                              |
| Klein NP <sup>20</sup>         | Moderate                        | Low                                                      | Low                                      | Low                                                        | Low                              | Low                                        | Low                                              |
| Zambrano LD <sup>12</sup>      | Moderate                        | Low                                                      | Low                                      | Low                                                        | Low                              | Low                                        | Low                                              |
| Amir O <sup>35</sup>           | Moderate                        | Moderate                                                 | Low                                      | Low                                                        | Low                              | Moderate                                   | Low                                              |
| Shi DS <sup>36</sup>           | Serious                         | Low                                                      | Moderate                                 | No information                                             | Low                              | Moderate                                   | Low                                              |
| Block JP <sup>37</sup>         | Moderate                        | Low                                                      | Low                                      | Low                                                        | Low                              | Low                                        | Low                                              |
| Hause AM <sup>39</sup>         | Serious                         | Moderate                                                 | Low                                      | Low                                                        | Low                              | Low                                        | Low                                              |

|                         |          |     |     |     |          |     |     |
|-------------------------|----------|-----|-----|-----|----------|-----|-----|
| Hause AM <sup>38</sup>  | Moderate | Low | Low | Low | Low      | Low | Low |
| Capponi M <sup>41</sup> | Moderate | Low | Low | Low | Low      | Low | Low |
| Bloise S <sup>40</sup>  | Moderate | Low | Low | Low | Moderate | Low | Low |

Each domain was judged as 'Low risk of bias', 'Moderate risk of bias', 'Critical risk of bias', or 'No information' in each study according to the Risk Of Bias In Non-randomized Studies of Exposure (ROBINS-E) tool.

eTable 4. The overall certainty of each outcome

| Outcome                                                      | Number of studies | Included study types | Risk of bias          | Inconsistency            | Indirectness            | Imprecision            | Publication bias                                              | Effect size (OR or proportion [95%CI]) | GRADE    |
|--------------------------------------------------------------|-------------------|----------------------|-----------------------|--------------------------|-------------------------|------------------------|---------------------------------------------------------------|----------------------------------------|----------|
| SARS-CoV-2 infections regardless of the presence of symptoms | 6                 | RCT and OS           | No serious limitation | No serious inconsistency | No serious indirectness | No serious imprecision | No serious publication bias                                   | 0.47 (0.35-0.64)                       | High     |
| Symptomatic SARS-CoV-2 infection                             | 6                 | RCT and OS           | No serious limitation | No serious inconsistency | No serious indirectness | No serious imprecision | Some concerns in publication bias                             | 0.53 (0.41-0.70)                       | High     |
| Hospitalizations due to COVID-19-related illnesses           | 4                 | OS                   | No serious limitation | No serious inconsistency | No serious indirectness | No serious imprecision | No serious publication bias                                   | 0.32 (0.15-0.68)                       | Moderate |
| Multisystem inflammatory syndrome in children                | 2                 | OS                   | No serious limitation | No serious inconsistency | No serious indirectness | No serious imprecision | Potential limitations are likely due to the number of studies | 0.05 (0.02-0.10)                       | Moderate |
| Any adverse events                                           | 2                 | RCT                  | No serious limitation | No serious inconsistency | No serious indirectness | No serious imprecision | Potential limitations are likely due to the number of studies | 1.92 (1.26-2.91)                       | Moderate |
| Adverse events that prevented normal daily activities        | 2                 | RCT                  | No serious limitation | No serious inconsistency | No serious indirectness | No serious imprecision | Potential limitations are likely due to the number of studies | 1.86 (0.39-8.94)                       | Moderate |

eFigure 1. Funnel plots for outcomes comparing vaccinated and unvaccinated children

a) SARS-CoV-2 infection with or without symptoms

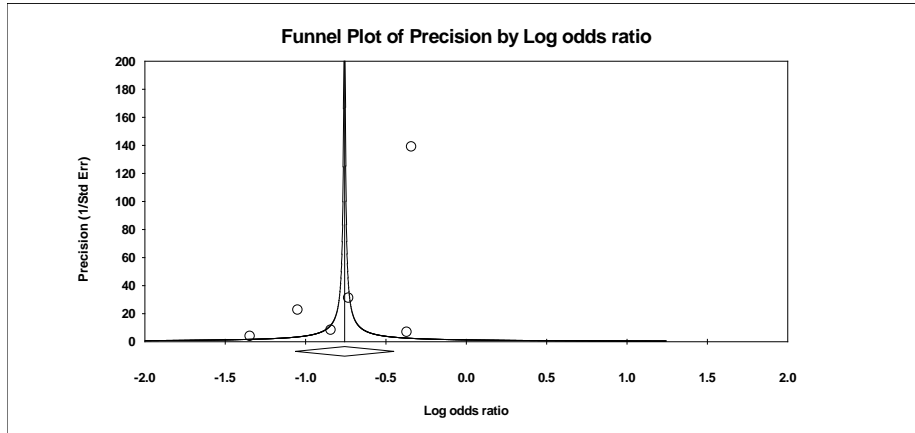

Egger's test provided a p-value of 0.106

b) Symptomatic SARS-CoV-2 infection

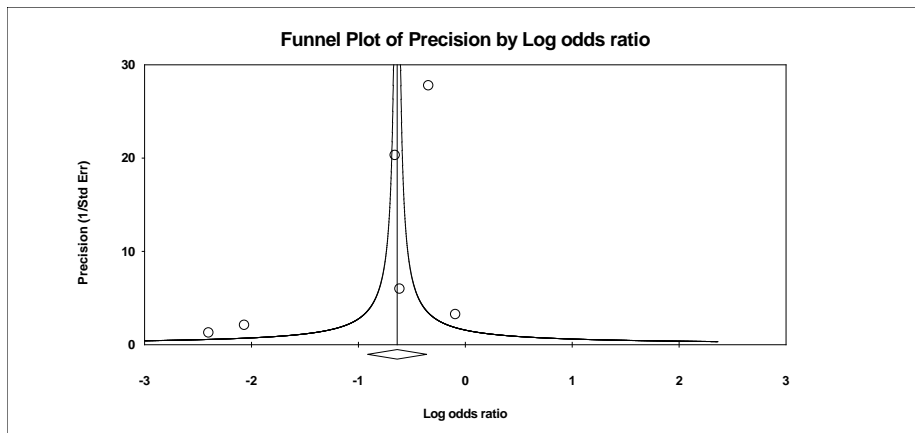

Egger's test provided a p-value of 0.285

c) Hospitalization due to COVID-19-related illnesses

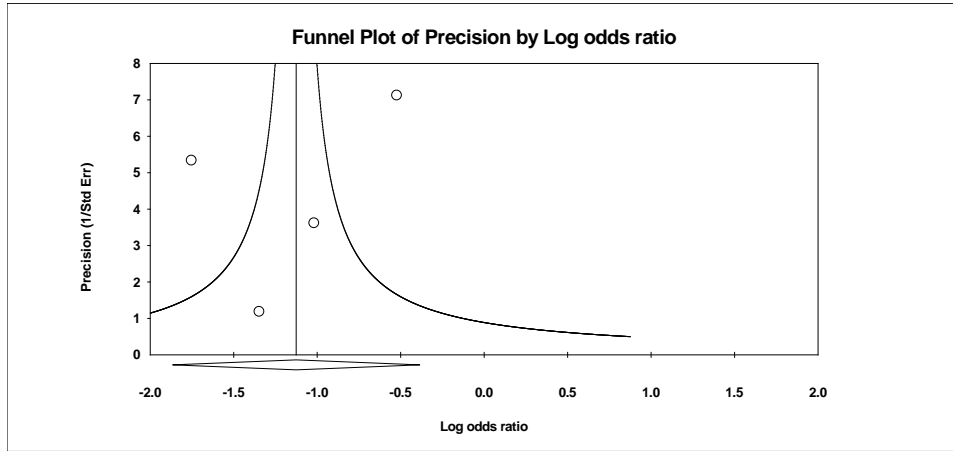

Egger's test provided a p-value of 0.691.

eFigure 2. Forest plots for SARS-CoV-2 infections with or without symptoms in the omicron-predominant period

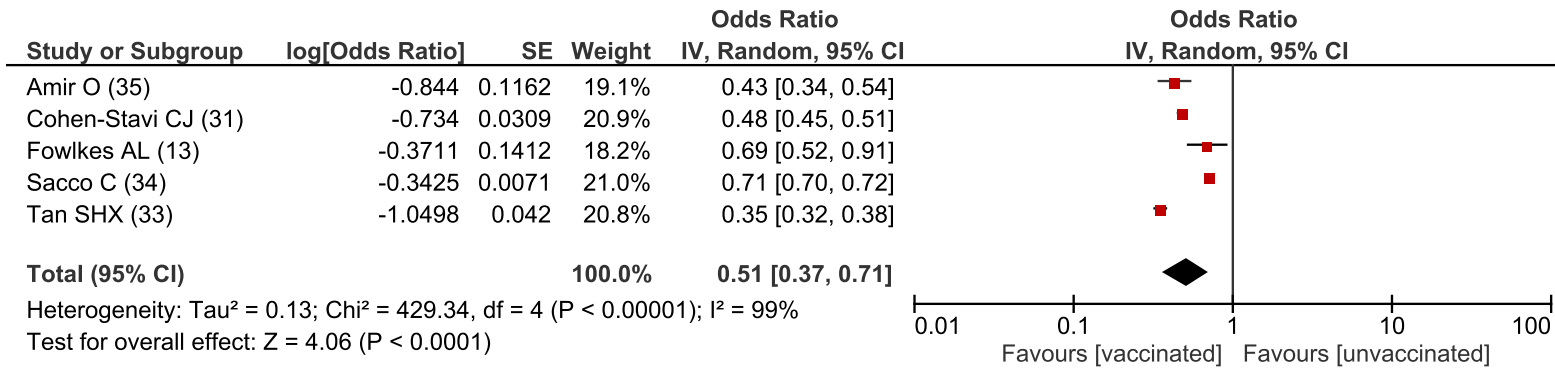

eFigure 3. Forest plots for symptomatic SARS-CoV-2 infections according to the predominant subvariants

a) Delta-predominant period

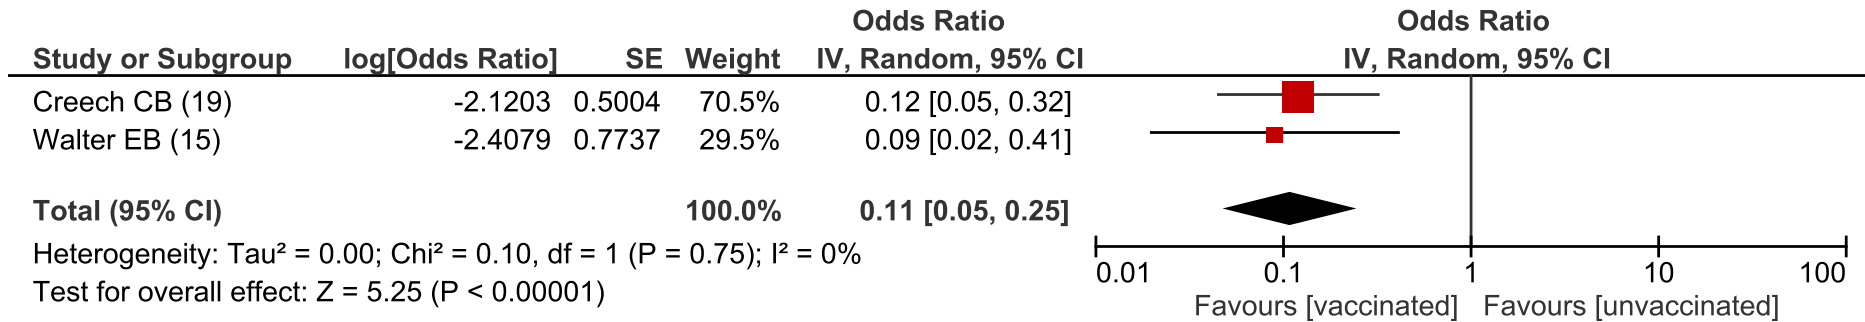

b) Omicron-predominant period

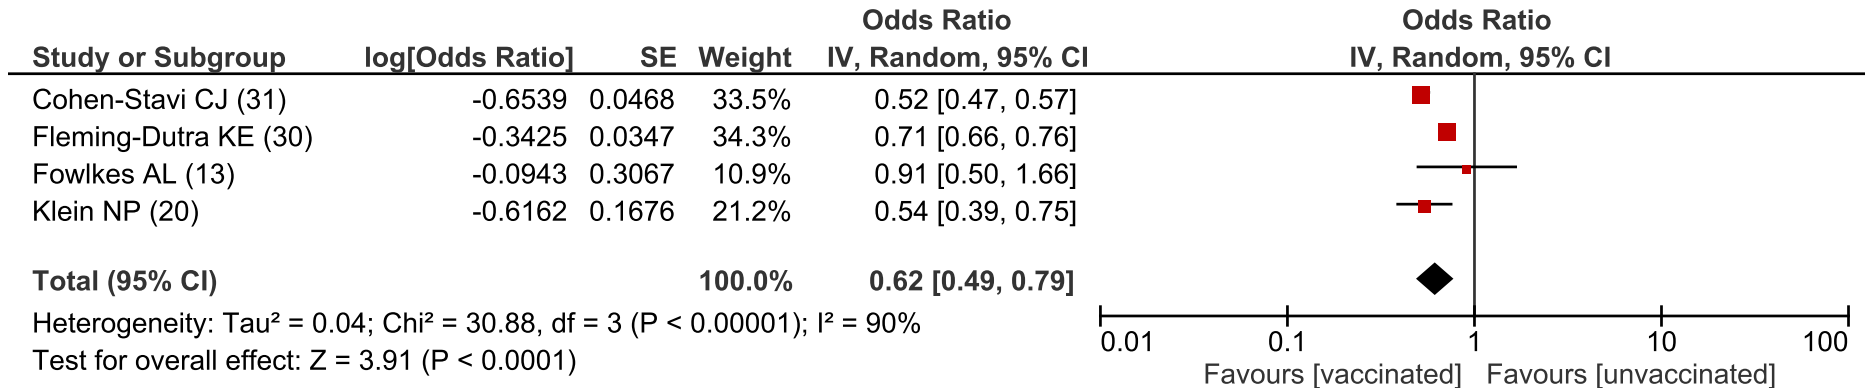



eFigure 4. Forest plots comparing 1-dose vaccination versus no vaccination

a) SARS-CoV-2 infections with or without symptoms

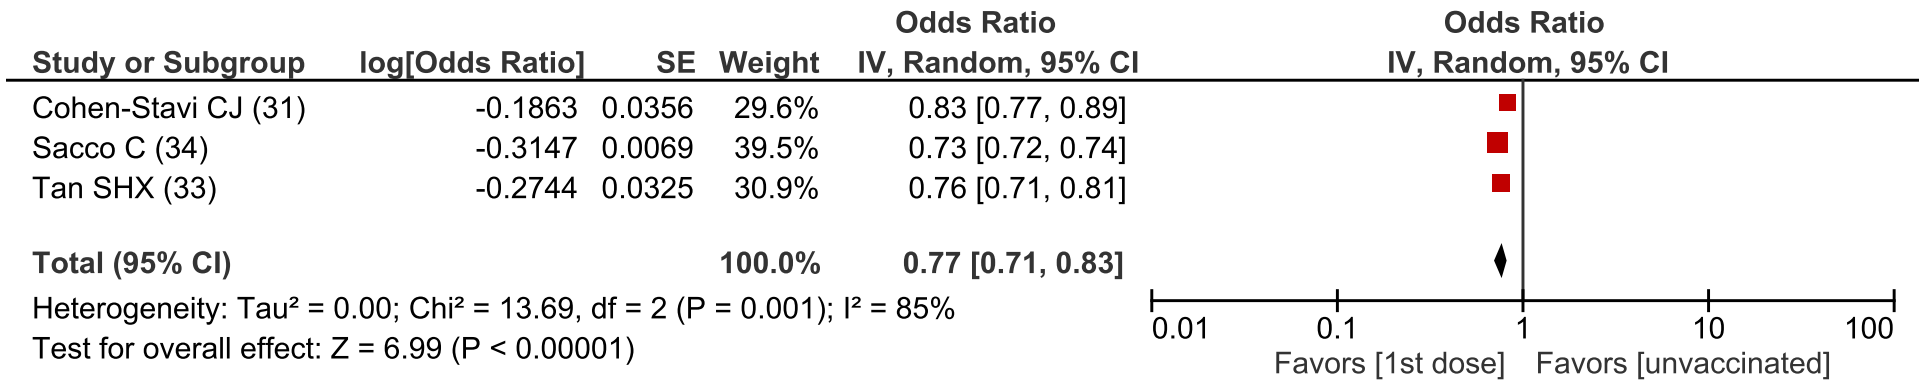

b) Hospitalizations due to COVID-19-related illnesses

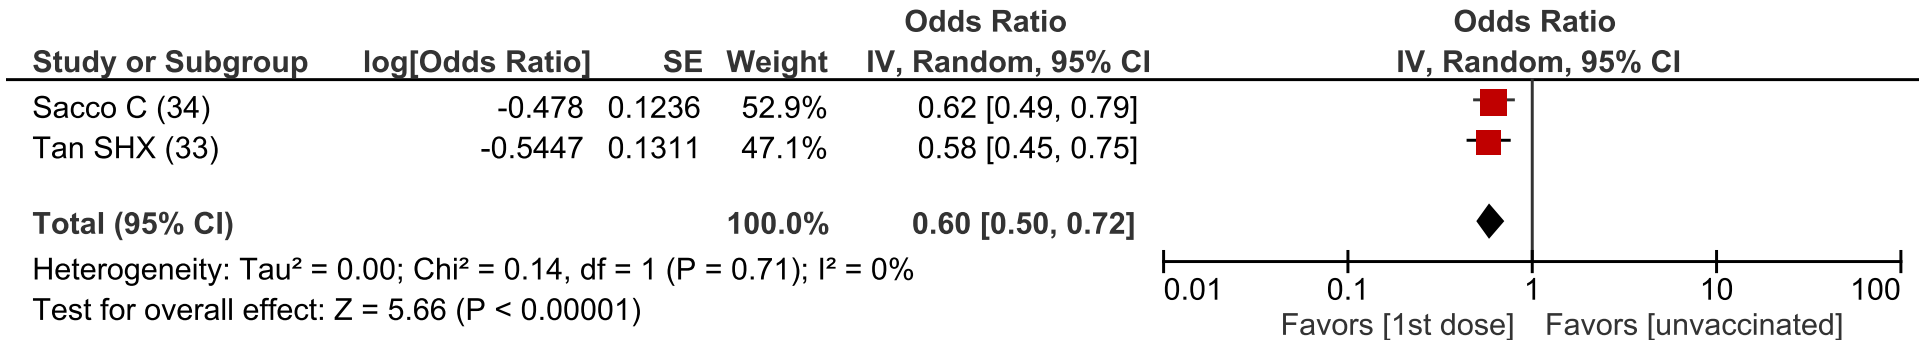

eFigure 5. Forest plots showing the proportion of adverse events following the 1st dose of mRNA vaccination

(a) Any local adverse events

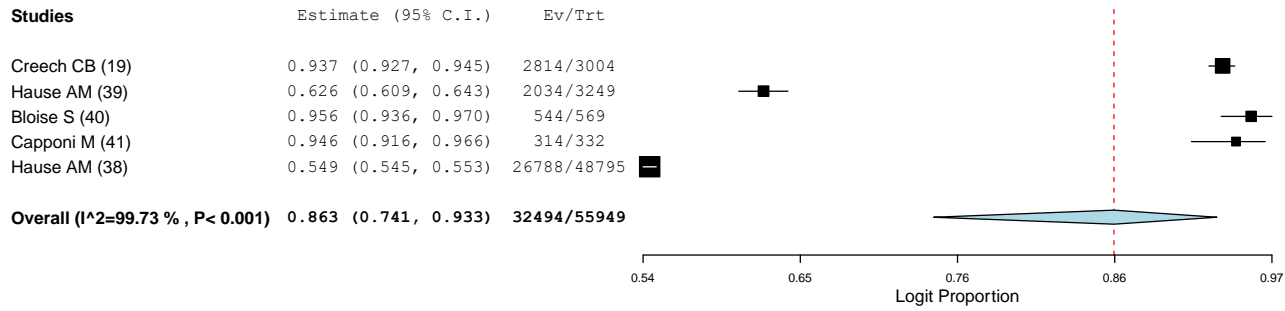

(b) Any systemic adverse events

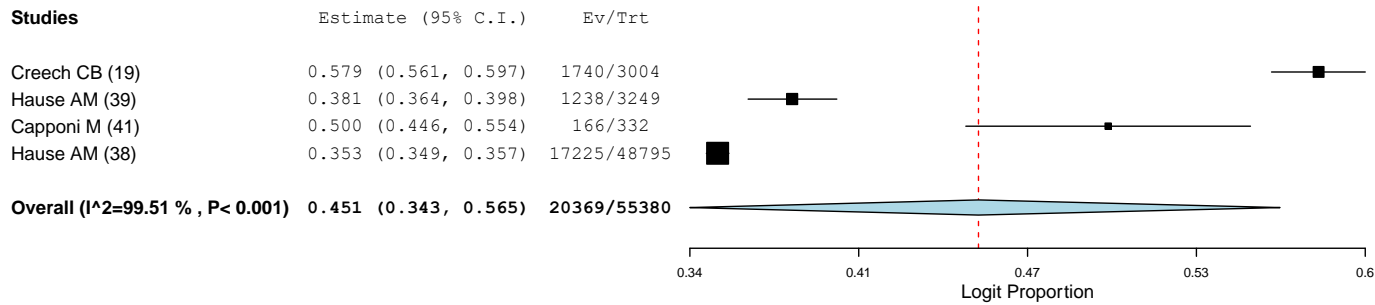

(c) Adverse events that prevented normal daily activities

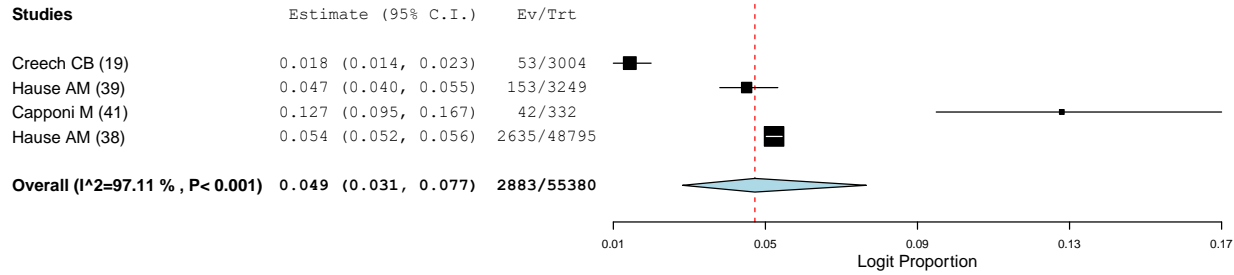

(d) Myocarditis

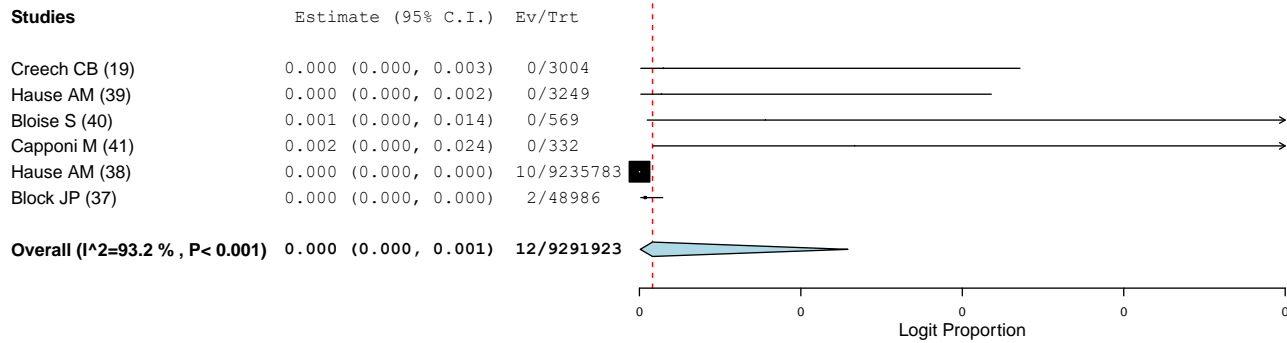

eFigure 6. Forest plots showing the proportion of adverse events following the 2nd dose of mRNA vaccine

a: any local adverse events

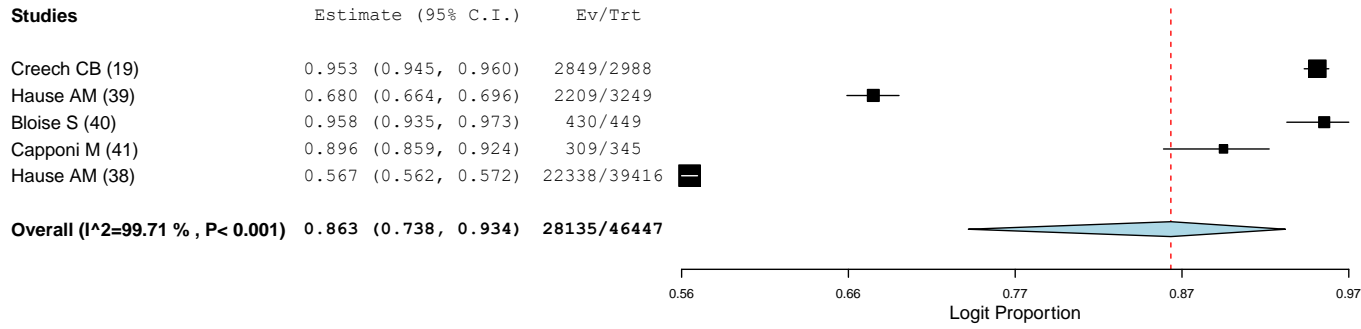

b: any systemic events

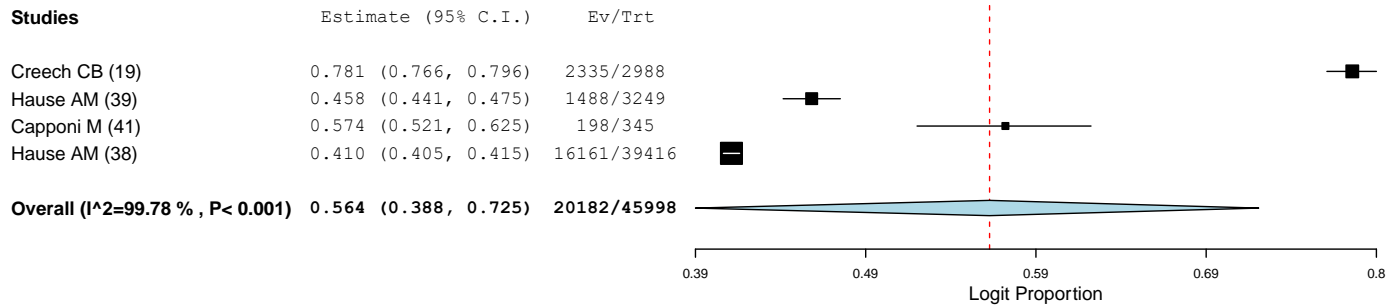

c: any adverse events that prevented normal daily activities

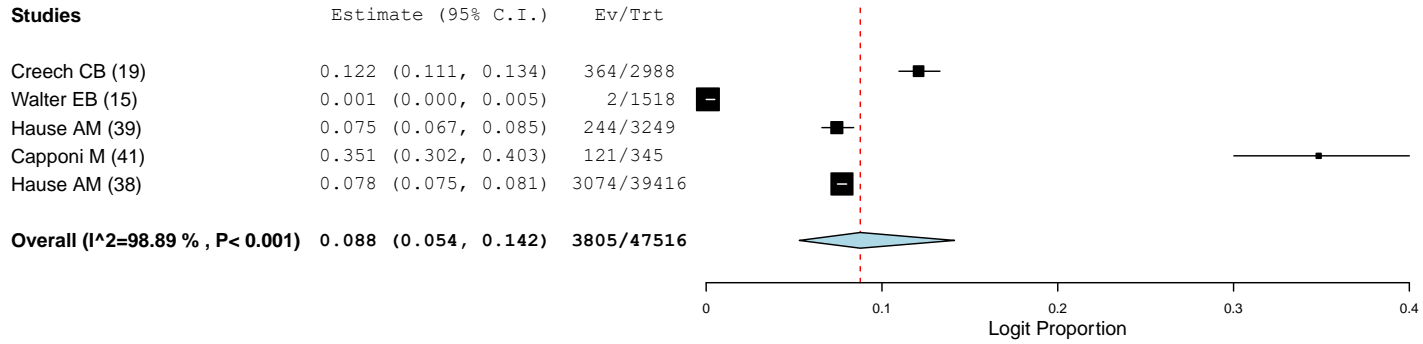

d: myocarditis

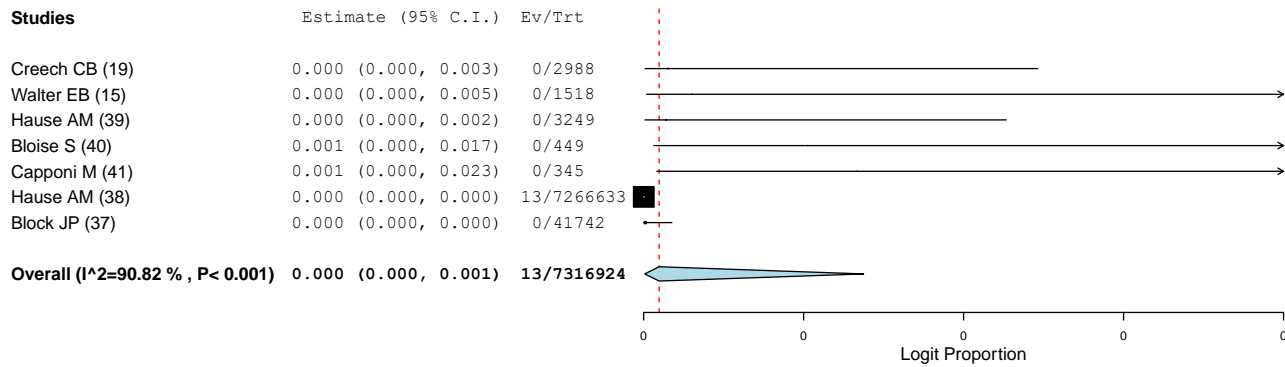

eFigure 7. Funnel plots for the proportion of each adverse events following the 2nd dose of mRNA vaccination

a) Any local adverse events

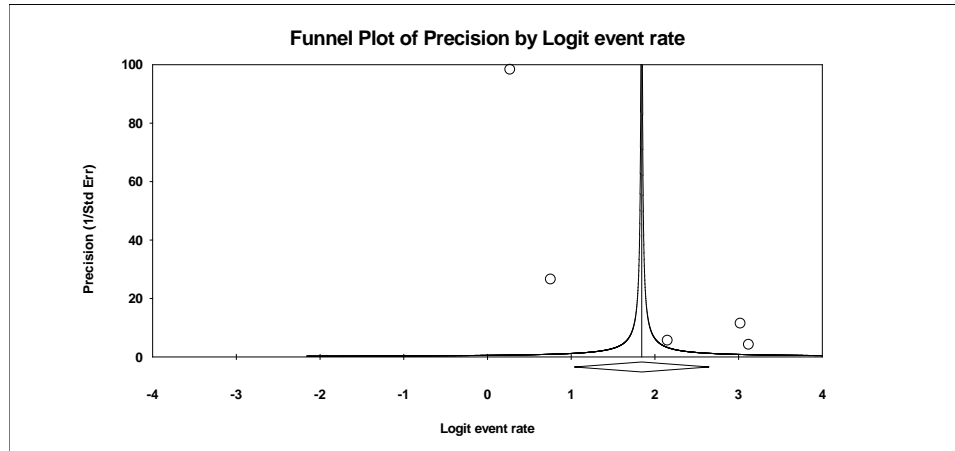

Egger's test provided a p-value of 0.050.

b) Any systemic adverse events

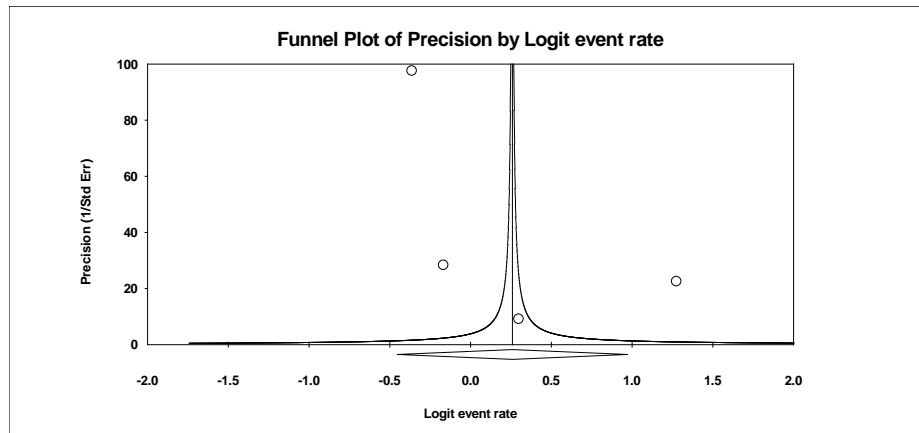

Egger's test provided a p-value of 0.302.

c) Adverse events that prevented normal daily activities

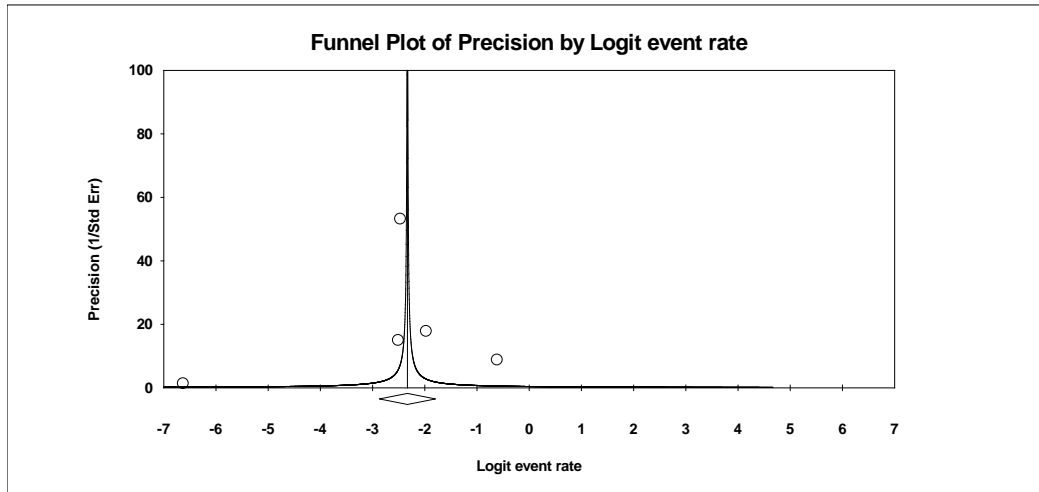

Egger's test provided a p-value of 0.534.

d) Myocarditis

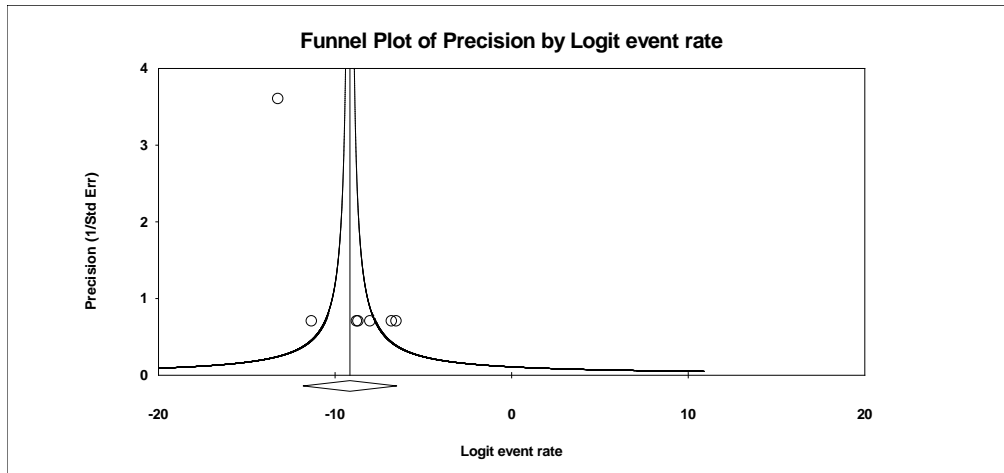

Egger's test provided a p-value of 0.002

eFigure 8. Sensitivity analysis using the trim-and-fill technique for myocarditis

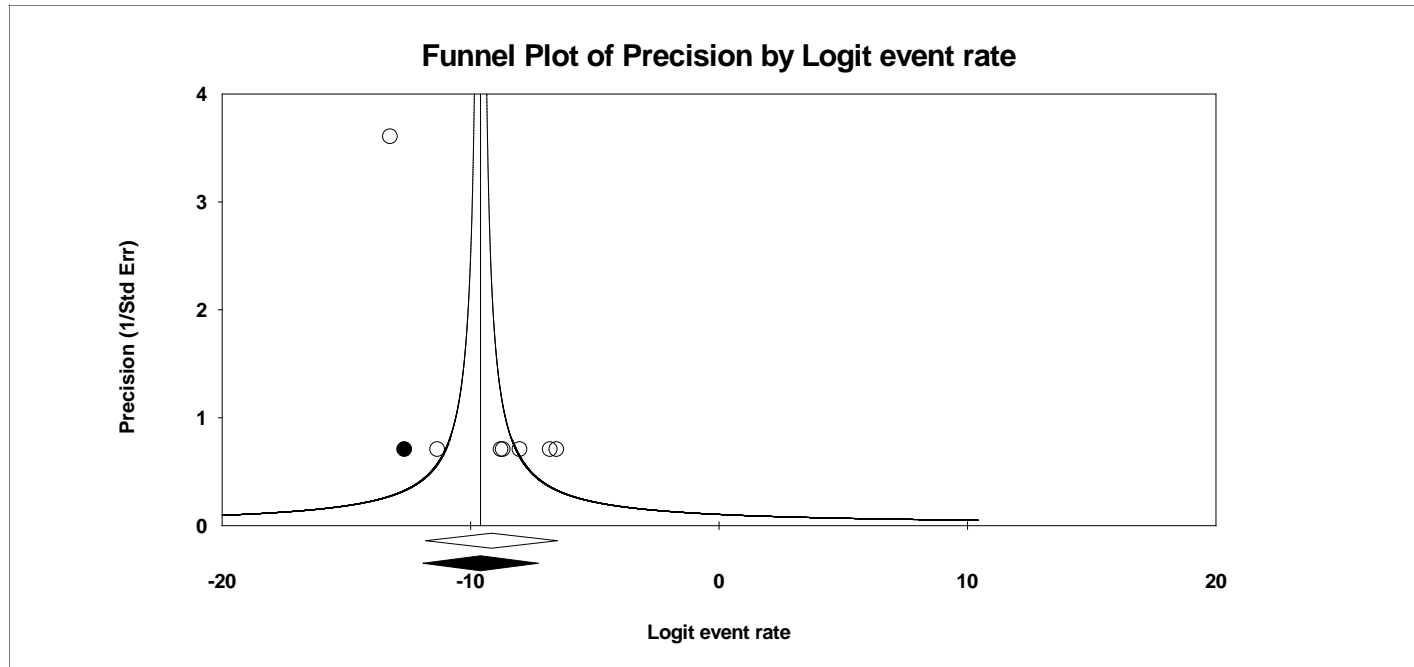

Trim-and-fill analysis provided a pooled proportion of <math><0.0002</math> (95% confidence interval 0.000-0.001)
