# Supplementary material
Source: PubMed Central journal article supplement (PMC9871947)
Supplement: jamapediatr-e226243-s002.pdf [file jamapediatr-e226243-s002.pdf]

## Data Sharing Statement

Watanabe. Assessment of Efficacy and Safety of mRNA COVID-19 Vaccines in Children Aged 5 to 11 Years. *JAMA Pediatr.* Published January 23, 2023.

doi:10.1001/jamapediatrics.2022.6243

### Data

**Data available:** Yes

**Data types:** Data dictionary

**How to access data:** The data that support the findings of this study are available from the corresponding author upon a reasonable request.

**When available:** With publication

### Supporting Documents

**Document types:** None

### Additional Information

**Who can access the data:** anyone requesting the data

**Types of analyses:** for any purpose

**Mechanisms of data availability:** with investigator support
